# Supplementary material
Source: PubMed Central journal article supplement (PMC4769208)
Supplement: ASN.2015030337_ASN2015030337SupplementaryData.pdf [file ASN.2015030337_ASN2015030337SupplementaryData.pdf]

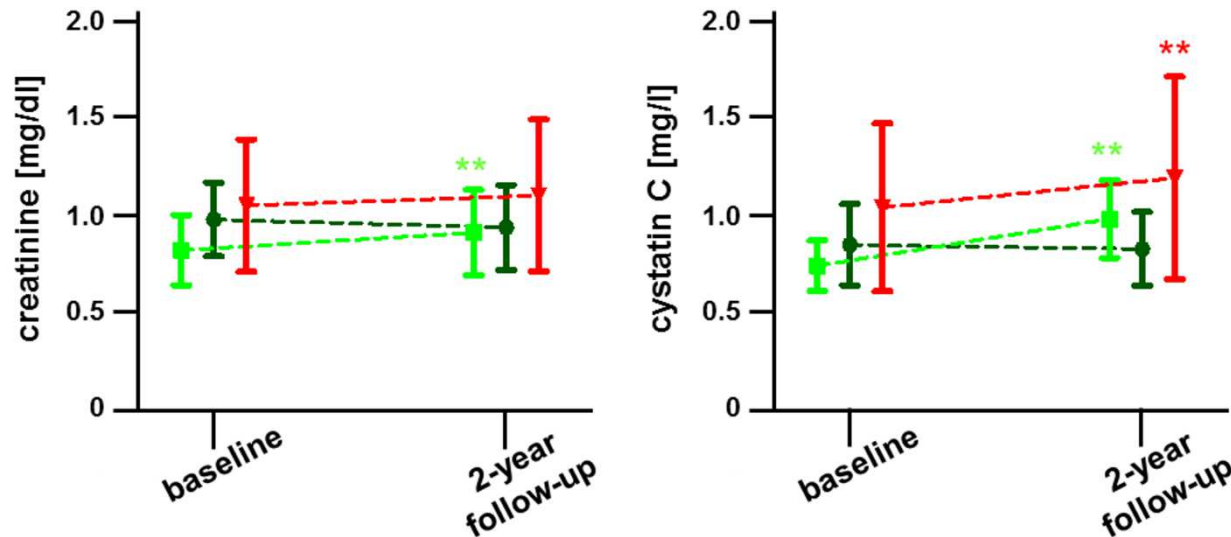

**Supplemental Figure 1: Changes in raw serum creatinine and cystatin C concentrations over time.** Patients under dialysis, with renal transplantation or hyperfiltration (>120 ml/min/1.73 m<sup>2</sup> based on creatinine clearance) have been excluded. Dark green color represents the regular-dose group, bright green the dose-reduction-switch group and red the switch group. Values are given in mean±SD. \*\*: p<0.01.
